# Supplementary material for: Mono-N-oxidation of heterocycle-fused pyrimidines
Source: Royal Society of Chemistry journal article supplement (doi:10.1039/d0dt03260c), 2021-01-01
Supplement: d0dt03260c1.pdf [file d0dt03260c1.pdf]

## Electronic Supplementary Information

### Mono-N-oxidation of Heterocycle-Fused Pyrimidines

Yongxing Tang,<sup>\* †a,b</sup> Kejia Li, <sup>†a</sup> Ajay Kumar Chinnam,<sup>b</sup> Richard J. Staples,<sup>c</sup> and Jean'ne M. Shreeve<sup>\*b</sup>

[a] Dr. Y. Tang, K. Li, Nanjing University of Science and Technology, Nanjing, 210094 (China)

[b] Dr. Y. Tang, Prof. J. M. Shreeve, Department of Chemistry, University of Idaho, Moscow, Idaho, 83844-2343 USA. Fax: (+1) 208-885-5173 E-mail: [jshreeve@uidaho.edu](mailto:jshreeve@uidaho.edu)

[c] Dr. A. K. Chinnam, Dr. R. J. Staples, Department of Chemistry, Michigan State University, East Lansing, Michigan 48824

<sup>†</sup> These authors contributed equally to this work.

Table of contents

|                                              |     |
|----------------------------------------------|-----|
| Crystal Structure Packing Diagrams           | S3  |
| Crystal Structure Analysis                   | S5  |
| $^1\text{H}$ and $^{13}\text{C}$ NMR spectra | S21 |

## Crystal Structure Packing Diagrams

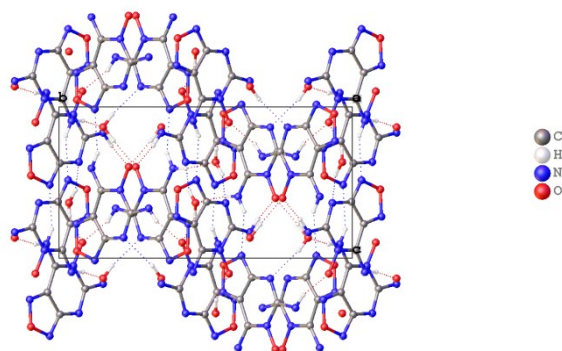

**Figure S1.** The packing diagram of  $2 \cdot \text{H}_2\text{O}$  viewed along *a* axis.

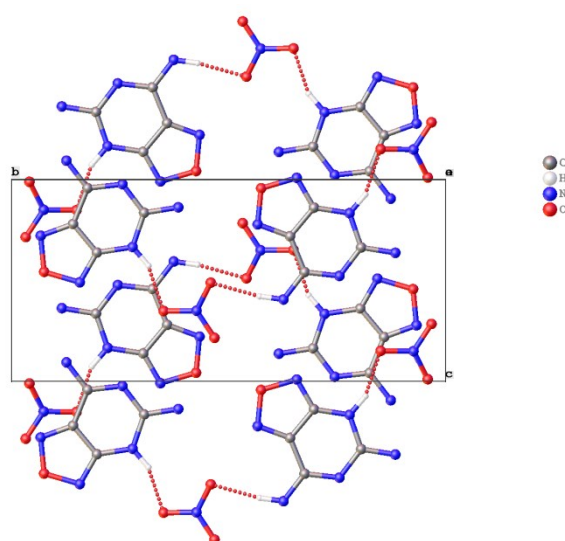

**Figure S2.** The packing diagram of **3** viewed along *a* axis.

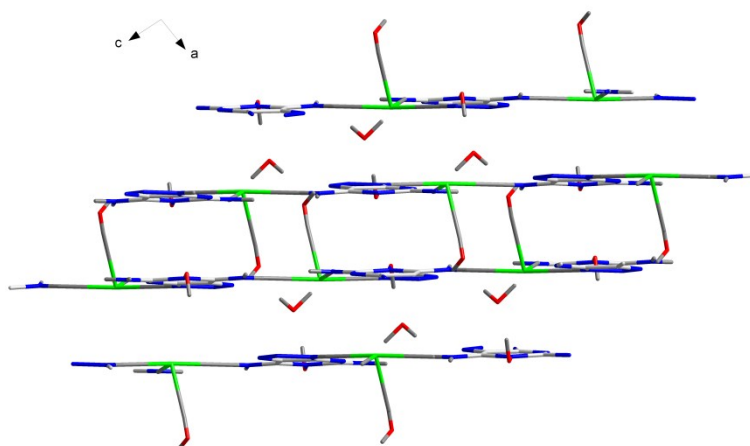

**Figure S3.** The packing diagram of  $5 \cdot \text{HCl} \cdot 2\text{H}_2\text{O}$  viewed along *b* axis.

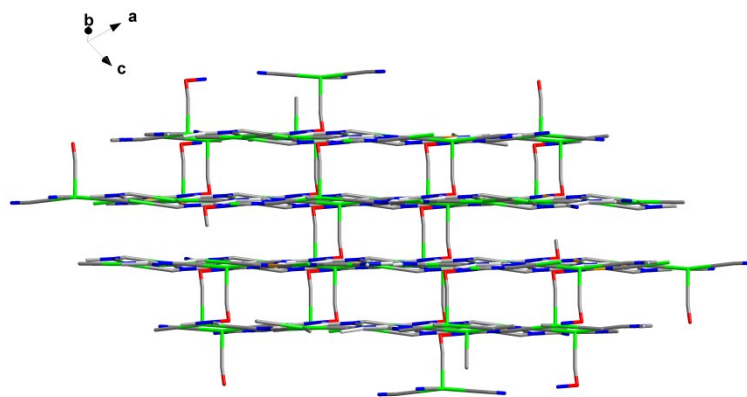

**Figure S4.** The packing diagram of  $7 \cdot 2\text{HCl}$  viewed along *b* axis.

## Crystal Structure Analysis

**Table S1.** Crystal data and structure refinement for **2·H<sub>2</sub>O**.

|                              |                                                             |
|------------------------------|-------------------------------------------------------------|
| Identification code          | 2·H <sub>2</sub> O                                          |
| CCDC number                  | 2040723                                                     |
| Formula                      | C <sub>4</sub> H <sub>6</sub> N <sub>6</sub> O <sub>3</sub> |
| $D_{calc.}/\text{g cm}^{-3}$ | 1.448                                                       |
| $\mu/\text{mm}^{-1}$         | 1.084                                                       |
| Formula Weight               | 186.15                                                      |
| Colour                       | yellow                                                      |
| Shape                        | needle                                                      |
| Size/mm <sup>3</sup>         | 0.20×0.03×0.03                                              |
| $T/\text{K}$                 | 100.00(11)                                                  |
| Crystal System               | tetragonal                                                  |
| Space Group                  | $P4_2/n$                                                    |
| $a/\text{Å}$                 | 14.9237(4)                                                  |
| $b/\text{Å}$                 | 14.9237(4)                                                  |
| $c/\text{Å}$                 | 7.6656(3)                                                   |
| $\alpha/^\circ$              | 90                                                          |
| $\beta/^\circ$               | 90                                                          |
| $\gamma/^\circ$              | 90                                                          |
| $V/\text{Å}^3$               | 1707.26(11)                                                 |
| $Z$                          | 8                                                           |
| $Z'$                         | 1                                                           |
| Wavelength/Å                 | 1.54184                                                     |
| Radiation type               | Cu K $\alpha$                                               |
| $\theta_{min}/^\circ$        | 4.189                                                       |
| $\theta_{max}/^\circ$        | 77.434                                                      |
| Measured Refl's.             | 9080                                                        |
| Indep't Refl's               | 1775                                                        |
| Refl's $I \geq 2\sigma(I)$   | 1559                                                        |
| $R_{int}$                    | 0.0505                                                      |
| Parameters                   | 120                                                         |
| Restraints                   | 0                                                           |
| Largest Peak                 | 0.250                                                       |
| Deepest Hole                 | -0.267                                                      |
| Goof                         | 1.144                                                       |
| $wR_2$ (all data)            | 0.1497                                                      |
| $wR_2$                       | 0.1468                                                      |
| $R_1$ (all data)             | 0.0670                                                      |
| $R_1$                        | 0.0613                                                      |

**Table S2.** Bond lengths [Å] and angles [°] for 2·H<sub>2</sub>O.

| Atom | Atom | Length/Å |
|------|------|----------|
| O1   | N3   | 1.394(3) |
| O1   | N4   | 1.381(3) |
| O2   | N1   | 1.342(2) |
| N1   | C1   | 1.412(3) |
| N1   | C4   | 1.333(3) |
| N2   | C1   | 1.333(3) |
| N2   | C2   | 1.355(3) |
| N3   | C2   | 1.319(3) |
| N4   | C3   | 1.302(3) |
| N5   | C1   | 1.306(3) |
| N6   | C4   | 1.308(3) |
| C2   | C3   | 1.415(3) |
| C3   | C4   | 1.446(3) |

| Atom | Atom | Atom | Angle/°    |
|------|------|------|------------|
| N4   | O1   | N3   | 112.26(18) |
| O2   | N1   | C1   | 117.34(19) |
| C4   | N1   | O2   | 118.06(19) |
| C4   | N1   | C1   | 124.4(2)   |
| C1   | N2   | C2   | 113.9(2)   |
| C2   | N3   | O1   | 104.3(2)   |
| C3   | N4   | O1   | 103.7(2)   |
| N2   | C1   | N1   | 123.6(2)   |
| N5   | C1   | N1   | 114.0(2)   |
| N5   | C1   | N2   | 122.4(2)   |
| N2   | C2   | C3   | 125.4(2)   |
| N3   | C2   | N2   | 126.2(2)   |
| N3   | C2   | C3   | 108.4(2)   |
| N4   | C3   | C2   | 111.3(2)   |
| N4   | C3   | C4   | 129.8(2)   |
| C2   | C3   | C4   | 119.0(2)   |
| N1   | C4   | C3   | 113.6(2)   |
| N6   | C4   | N1   | 120.8(2)   |
| N6   | C4   | C3   | 125.7(2)   |

**Table S3.** Torsion angles [°] for 2·H<sub>2</sub>O.

| Atom | Atom | Atom | Atom | Angle°    |
|------|------|------|------|-----------|
| O1   | N3   | C2   | N2   | -179.8(3) |
| O1   | N3   | C2   | C3   | 0.4(3)    |
| O1   | N4   | C3   | C2   | 0.4(4)    |
| O1   | N4   | C3   | C4   | -179.9(3) |
| O2   | N1   | C1   | N2   | 177.4(2)  |
| O2   | N1   | C1   | N5   | -2.3(3)   |
| O2   | N1   | C4   | N6   | 1.3(4)    |
| O2   | N1   | C4   | C3   | -179.0(2) |
| N2   | C2   | C3   | N4   | 179.7(3)  |
| N2   | C2   | C3   | C4   | -0.1(4)   |
| N3   | O1   | N4   | C3   | -0.1(4)   |
| N3   | C2   | C3   | N4   | -0.5(4)   |
| N3   | C2   | C3   | C4   | 179.8(3)  |
| N4   | O1   | N3   | C2   | -0.2(4)   |
| N4   | C3   | C4   | N1   | -176.9(3) |
| N4   | C3   | C4   | N6   | 2.8(5)    |
| C1   | N1   | C4   | N6   | 176.4(2)  |
| C1   | N1   | C4   | C3   | -3.8(3)   |
| C1   | N2   | C2   | N3   | 178.5(3)  |
| C1   | N2   | C2   | C3   | -1.7(4)   |
| C2   | N2   | C1   | N1   | 0.8(3)    |
| C2   | N2   | C1   | N5   | -179.6(2) |
| C2   | C3   | C4   | N1   | 2.8(4)    |
| C2   | C3   | C4   | N6   | -177.5(3) |
| C4   | N1   | C1   | N2   | 2.2(4)    |
| C4   | N1   | C1   | N5   | -177.4(2) |

**Table S4.** Hydrogen bond information for  $2 \cdot \text{H}_2\text{O}$ .

| <b>D</b> | <b>H</b> | <b>A</b>         | <b>d(D-H)/Å</b> | <b>d(H-A)/Å</b> | <b>d(D-A)/Å</b> | <b>D-H-A/deg</b> |
|----------|----------|------------------|-----------------|-----------------|-----------------|------------------|
| N5       | H5A      | O2 <sup>1</sup>  | 0.86            | 1.92            | 2.759(2)        | 163.6            |
| N6       | H6A      | N3 <sup>2</sup>  | 0.86            | 2.26            | 3.013(3)        | 146.1            |
| N6       | H6B      | O1W <sup>3</sup> | 0.86            | 1.88            | 2.720(3)        | 166.7            |
| O1W      | H1WA     | O2 <sup>4</sup>  | 0.85            | 1.88            | 2.694(2)        | 161.0            |
| O1W      | H1WB     | N2 <sup>5</sup>  | 0.85            | 2.06            | 2.869(3)        | 159.0            |

<sup>1</sup>1-y,1/2+x,1/2+z;   <sup>2</sup>+x,+y,-1+z;   <sup>3</sup>1-x,1-y,-1-z;   <sup>4</sup>-1/2+y,1-x,1/2+z;   <sup>5</sup>-1/2+y,1-x,-1/2+z



**Table S5.** Crystal data and structure refinement for **3**.

| Identification code          | <b>3</b>                                                    |
|------------------------------|-------------------------------------------------------------|
| CCDC number                  | 2040720                                                     |
| Formula                      | C <sub>4</sub> H <sub>5</sub> N <sub>7</sub> O <sub>4</sub> |
| $D_{calc.}/\text{g cm}^{-3}$ | 1.859                                                       |
| $\mu/\text{mm}^{-1}$         | 1.452                                                       |
| Formula Weight               | 215.15                                                      |
| Colour                       | colourless                                                  |
| Shape                        | plate                                                       |
| Size/mm <sup>3</sup>         | 0.16×0.10×0.04                                              |
| $T/\text{K}$                 | 100.00(10)                                                  |
| Crystal System               | monoclinic                                                  |
| Space Group                  | $P2_1/n$                                                    |
| $a/\text{Å}$                 | 6.1448(3)                                                   |
| $b/\text{Å}$                 | 16.4016(6)                                                  |
| $c/\text{Å}$                 | 7.6331(3)                                                   |
| $\alpha/^\circ$              | 90                                                          |
| $\beta/^\circ$               | 92.289(3)                                                   |
| $\gamma/^\circ$              | 90                                                          |
| $V/\text{Å}^3$               | 768.68(6)                                                   |
| $Z$                          | 4                                                           |
| $Z'$                         | 1                                                           |
| Wavelength/Å                 | 1.54184                                                     |
| Radiation type               | Cu K $\alpha$                                               |
| $\theta_{min}/^\circ$        | 5.394                                                       |
| $\theta_{max}/^\circ$        | 77.136                                                      |
| Measured Refl's.             | 4461                                                        |
| Indep't Refl's               | 1526                                                        |
| Refl's $I \geq 2\sigma(I)$   | 1336                                                        |
| $R_{int}$                    | 0.0430                                                      |
| Parameters                   | 156                                                         |
| Restraints                   | 0                                                           |
| Largest Peak                 | 0.292                                                       |
| Deepest Hole                 | -0.331                                                      |
| Goof                         | 1.069                                                       |
| $wR_2$ (all data)            | 0.1140                                                      |
| $wR_2$                       | 0.1096                                                      |
| $R_1$ (all data)             | 0.0458                                                      |
| $R_1$                        | 0.0409                                                      |

**Table S6.** Bond lengths [ $\text{\AA}$ ] and angles [ $^\circ$ ] for **3**.

| <b>Atom</b> | <b>Atom</b> | <b>Length/<math>\text{\AA}</math></b> |
|-------------|-------------|---------------------------------------|
| O1          | N3          | 1.4033(18)                            |
| O1          | N4          | 1.3739(18)                            |
| N1          | C1          | 1.364(2)                              |
| N1          | C4          | 1.370(2)                              |
| N2          | C3          | 1.324(2)                              |
| N2          | C4          | 1.356(2)                              |
| N3          | C1          | 1.303(2)                              |
| N4          | C2          | 1.303(2)                              |
| N5          | C4          | 1.306(2)                              |
| N6          | C3          | 1.312(2)                              |
| C1          | C2          | 1.407(2)                              |
| C2          | C3          | 1.465(2)                              |
| O2          | N7          | 1.2605(19)                            |
| O3          | N7          | 1.2588(18)                            |
| O4          | N7          | 1.2444(18)                            |

| <b>Atom</b> | <b>Atom</b> | <b>Atom</b> | <b>Angle/<math>^\circ</math></b> |
|-------------|-------------|-------------|----------------------------------|
| N4          | O1          | N3          | 111.68(12)                       |
| C1          | N1          | C4          | 117.41(14)                       |
| C3          | N2          | C4          | 120.95(14)                       |
| C1          | N3          | O1          | 103.60(12)                       |
| C2          | N4          | O1          | 104.70(13)                       |
| N1          | C1          | C2          | 121.11(14)                       |
| N3          | C1          | N1          | 128.65(15)                       |
| N3          | C1          | C2          | 110.24(15)                       |
| N4          | C2          | C1          | 109.78(14)                       |
| N4          | C2          | C3          | 132.15(15)                       |
| C1          | C2          | C3          | 118.07(15)                       |
| N2          | C3          | C2          | 118.38(14)                       |
| N6          | C3          | N2          | 121.12(15)                       |
| N6          | C3          | C2          | 120.50(15)                       |
| N2          | C4          | N1          | 124.01(15)                       |
| N5          | C4          | N1          | 117.67(15)                       |
| N5          | C4          | N2          | 118.32(15)                       |
| O3          | N7          | O2          | 119.07(13)                       |
| O4          | N7          | O2          | 120.35(13)                       |
| O4          | N7          | O3          | 120.57(13)                       |

**Table S7.** Torsion angles [°] for **3**.

| Atom | Atom | Atom | Atom | Angle <sup>o</sup> |
|------|------|------|------|--------------------|
| O1   | N3   | C1   | N1   | 178.79(14)         |
| O1   | N3   | C1   | C2   | -0.61(16)          |
| O1   | N4   | C2   | C1   | -0.12(17)          |
| O1   | N4   | C2   | C3   | 179.63(16)         |
| N1   | C1   | C2   | N4   | -178.96(13)        |
| N1   | C1   | C2   | C3   | 1.3(2)             |
| N3   | O1   | N4   | C2   | -0.26(17)          |
| N3   | C1   | C2   | N4   | 0.50(19)           |
| N3   | C1   | C2   | C3   | -179.29(14)        |
| N4   | O1   | N3   | C1   | 0.55(16)           |
| N4   | C2   | C3   | N2   | 177.65(16)         |
| N4   | C2   | C3   | N6   | -2.4(3)            |
| C1   | N1   | C4   | N2   | -1.7(2)            |
| C1   | N1   | C4   | N5   | 178.69(14)         |
| C1   | C2   | C3   | N2   | -2.6(2)            |
| C1   | C2   | C3   | N6   | 177.34(14)         |
| C3   | N2   | C4   | N1   | 0.3(2)             |
| C3   | N2   | C4   | N5   | 179.90(14)         |
| C4   | N1   | C1   | N3   | -178.54(15)        |
| C4   | N1   | C1   | C2   | 0.8(2)             |
| C4   | N2   | C3   | N6   | -178.06(14)        |
| C4   | N2   | C3   | C2   | 1.9(2)             |

**Table S8.** Hydrogen bond information for **3**.

| <b>D</b> | <b>H</b> | <b>A</b>        | <b>d(D-H)/Å</b> | <b>d(H-A)/Å</b> | <b>d(D-A)/Å</b> | <b>D-H-A/deg</b> |
|----------|----------|-----------------|-----------------|-----------------|-----------------|------------------|
| N1       | H1       | O2              | 0.93(3)         | 1.83(3)         | 2.7047(19)      | 157(3)           |
| N6       | H6A      | O3 <sup>1</sup> | 0.91(2)         | 2.00(2)         | 2.8875(19)      | 163(2)           |

<sup>1</sup>1/2-x,-1/2+y,3/2-z

**Table S9.** Crystal data and structure refinement for **5·HCl·2H<sub>2</sub>O**.

| Identification code          | <b>5·HCl·2H<sub>2</sub>O</b>                                   |
|------------------------------|----------------------------------------------------------------|
| CCDC number                  | 2040721                                                        |
| Formula                      | C <sub>4</sub> H <sub>10</sub> ClN <sub>7</sub> O <sub>3</sub> |
| $D_{calc.}/\text{g cm}^{-3}$ | 1.610                                                          |
| $\mu/\text{mm}^{-1}$         | 3.531                                                          |
| Formula Weight               | 239.64                                                         |
| Colour                       | yellow                                                         |
| Shape                        | plate                                                          |
| Size/mm <sup>3</sup>         | 0.21×0.15×0.05                                                 |
| $T/\text{K}$                 | 100.00(10)                                                     |
| Crystal System               | monoclinic                                                     |
| Space Group                  | $P2_1/n$                                                       |
| $a/\text{Å}$                 | 8.3157(4)                                                      |
| $b/\text{Å}$                 | 9.2267(4)                                                      |
| $c/\text{Å}$                 | 12.9583(6)                                                     |
| $\alpha/^\circ$              | 90                                                             |
| $\beta/^\circ$               | 95.961(4)                                                      |
| $\gamma/^\circ$              | 90                                                             |
| $V/\text{Å}^3$               | 988.87(7)                                                      |
| $Z$                          | 4                                                              |
| $Z'$                         | 1                                                              |
| Wavelength/Å                 | 1.54184                                                        |
| Radiation type               | Cu K $\alpha$                                                  |
| $\theta_{min}/^\circ$        | 5.898                                                          |
| $\theta_{max}/^\circ$        | 77.347                                                         |
| Measured Refl's.             | 11264                                                          |
| Indep't Refl's               | 2044                                                           |
| Refl's $I \geq 2\sigma(I)$   | 1862                                                           |
| $R_{int}$                    | 0.0557                                                         |
| Parameters                   | 176                                                            |
| Restraints                   | 0                                                              |
| Largest Peak                 | 0.417                                                          |
| Deepest Hole                 | -0.439                                                         |
| Goof                         | 1.080                                                          |
| $wR_2$ (all data)            | 0.1168                                                         |
| $wR_2$                       | 0.1129                                                         |
| $R_1$ (all data)             | 0.0448                                                         |
| $R_1$                        | 0.0417                                                         |

**Table S10.** Bond lengths [ $\text{\AA}$ ] and angles [ $^\circ$ ] for  $5 \cdot \text{HCl} \cdot 2\text{H}_2\text{O}$ .

| <b>Atom</b> | <b>Atom</b> | <b>Length/<math>\text{\AA}</math></b> |
|-------------|-------------|---------------------------------------|
| O1          | N1          | 1.377(2)                              |
| N1          | C1          | 1.365(3)                              |
| N1          | C2          | 1.399(3)                              |
| N2          | C2          | 1.332(3)                              |
| N2          | C3          | 1.343(3)                              |
| N3          | N4          | 1.363(2)                              |
| N3          | C3          | 1.348(3)                              |
| N4          | N5          | 1.307(2)                              |
| N5          | C4          | 1.364(3)                              |
| N6          | C1          | 1.307(3)                              |
| N7          | C2          | 1.315(3)                              |
| C1          | C4          | 1.420(3)                              |
| C3          | C4          | 1.382(3)                              |

| <b>Atom</b> | <b>Atom</b> | <b>Atom</b> | <b>Angle/<math>^\circ</math></b> |
|-------------|-------------|-------------|----------------------------------|
| O1          | N1          | C2          | 117.19(16)                       |
| C1          | N1          | O1          | 117.20(16)                       |
| C1          | N1          | C2          | 125.59(17)                       |
| C2          | N2          | C3          | 113.46(16)                       |
| C3          | N3          | N4          | 109.89(17)                       |
| N5          | N4          | N3          | 108.98(16)                       |
| N4          | N5          | C4          | 107.18(16)                       |
| N1          | C1          | C4          | 112.43(17)                       |
| N6          | C1          | N1          | 119.94(19)                       |
| N6          | C1          | C4          | 127.63(19)                       |
| N2          | C2          | N1          | 121.75(18)                       |
| N7          | C2          | N1          | 116.23(18)                       |
| N7          | C2          | N2          | 122.00(18)                       |
| N2          | C3          | N3          | 127.89(18)                       |
| N2          | C3          | C4          | 127.96(19)                       |
| N3          | C3          | C4          | 104.16(17)                       |
| N5          | C4          | C1          | 131.51(18)                       |
| N5          | C4          | C3          | 109.79(18)                       |
| C3          | C4          | C1          | 118.70(18)                       |

**Table S11.** Torsion angles [°] for **5·HCl·2H<sub>2</sub>O**.

| Atom | Atom | Atom | Atom | Angle/°     |
|------|------|------|------|-------------|
| O1   | N1   | C1   | N6   | -1.8(3)     |
| O1   | N1   | C1   | C4   | 177.39(16)  |
| O1   | N1   | C2   | N2   | -174.72(17) |
| O1   | N1   | C2   | N7   | 4.3(2)      |
| N1   | C1   | C4   | N5   | 179.75(19)  |
| N1   | C1   | C4   | C3   | -1.0(3)     |
| N2   | C3   | C4   | N5   | -179.75(18) |
| N2   | C3   | C4   | C1   | 0.8(3)      |
| N3   | N4   | N5   | C4   | 0.0(2)      |
| N3   | C3   | C4   | N5   | 0.3(2)      |
| N3   | C3   | C4   | C1   | -179.16(17) |
| N4   | N3   | C3   | N2   | 179.78(18)  |
| N4   | N3   | C3   | C4   | -0.2(2)     |
| N4   | N5   | C4   | C1   | 179.1(2)    |
| N4   | N5   | C4   | C3   | -0.2(2)     |
| N6   | C1   | C4   | N5   | -1.1(4)     |
| N6   | C1   | C4   | C3   | 178.17(19)  |
| C1   | N1   | C2   | N2   | 3.9(3)      |
| C1   | N1   | C2   | N7   | -177.10(18) |
| C2   | N1   | C1   | N6   | 179.55(18)  |
| C2   | N1   | C1   | C4   | -1.2(3)     |
| C2   | N2   | C3   | N3   | -178.43(19) |
| C2   | N2   | C3   | C4   | 1.6(3)      |
| C3   | N2   | C2   | N1   | -3.8(3)     |
| C3   | N2   | C2   | N7   | 177.33(18)  |
| C3   | N3   | N4   | N5   | 0.1(2)      |

**Table S12.** Hydrogen bond information for **5·HCl·2H<sub>2</sub>O** .

| <b>D</b> | <b>H</b> | <b>A</b>        | <b>d(D-H)/Å</b> | <b>d(H-A)/Å</b> | <b>d(D-A)/Å</b> | <b>D-H-A/deg</b> |
|----------|----------|-----------------|-----------------|-----------------|-----------------|------------------|
| N6       | H6A      | O2              | 0.87(3)         | 1.97(3)         | 2.830(2)        | 170(3)           |
| N7       | H7B      | O2 <sup>1</sup> | 0.87(3)         | 2.05(3)         | 2.881(2)        | 160(3)           |
| O2       | H2B      | N4 <sup>2</sup> | 0.81(4)         | 2.26(4)         | 3.016(2)        | 155(3)           |
| O3       | H3A      | N5 <sup>3</sup> | 0.84(3)         | 2.08(3)         | 2.827(2)        | 148(2)           |
| O3       | H3B      | N2              | 0.92(4)         | 1.90(4)         | 2.778(2)        | 158(4)           |
| O1       | H1       | O3 <sup>4</sup> | 0.91(4)         | 1.59(4)         | 2.494(2)        | 171(3)           |

<sup>1</sup>-1/2+x,1/2-y,1/2+z;    <sup>2</sup>+x,-1+y,+z;    <sup>3</sup>-1/2+x,3/2-y,1/2+z;    <sup>4</sup>3/2-x,-1/2+y,3/2-z



**Table S13.** Crystal data and structure refinement for 7·2HCl.

| Identification code          | 7·2HCl                                                         |
|------------------------------|----------------------------------------------------------------|
| CCDC number                  | 2040722                                                        |
| Formula                      | C <sub>5</sub> H <sub>8</sub> Cl <sub>2</sub> N <sub>6</sub> O |
| $D_{calc.}/\text{g cm}^{-3}$ | 1.715                                                          |
| $\mu/\text{mm}^{-1}$         | 6.167                                                          |
| Formula Weight               | 239.07                                                         |
| Colour                       | colourless                                                     |
| Shape                        | needle                                                         |
| Size/mm <sup>3</sup>         | 0.17×0.05×0.02                                                 |
| $T/\text{K}$                 | 100.01(10)                                                     |
| Crystal System               | triclinic                                                      |
| Space Group                  | <i>P</i> -1                                                    |
| $a/\text{Å}$                 | 6.3903(2)                                                      |
| $b/\text{Å}$                 | 7.8053(2)                                                      |
| $c/\text{Å}$                 | 9.9575(2)                                                      |
| $\alpha/^\circ$              | 79.811(2)                                                      |
| $\beta/^\circ$               | 75.385(2)                                                      |
| $\gamma/^\circ$              | 76.143(2)                                                      |
| $V/\text{Å}^3$               | 463.01(2)                                                      |
| $Z$                          | 2                                                              |
| $Z'$                         | 1                                                              |
| Wavelength/Å                 | 1.54184                                                        |
| Radiation type               | Cu K $\alpha$                                                  |
| $\theta_{min}/^\circ$        | 4.625                                                          |
| $\theta_{max}/^\circ$        | 77.349                                                         |
| Measured Refl's.             | 11036                                                          |
| Indep't Refl's               | 1884                                                           |
| Refl's $I \geq 2\sigma(I)$   | 1717                                                           |
| $R_{int}$                    | 0.0661                                                         |
| Parameters                   | 155                                                            |
| Restraints                   | 0                                                              |
| Largest Peak                 | 0.439                                                          |
| Deepest Hole                 | -0.529                                                         |
| Goof                         | 1.136                                                          |
| $wR_2$ (all data)            | 0.1123                                                         |
| $wR_2$                       | 0.1098                                                         |
| $R_1$ (all data)             | 0.0431                                                         |
| $R_1$                        | 0.0400                                                         |

**Table S14.** Bond lengths [Å] and angles [°] for 7·2HCl.

| <b>Atom</b> | <b>Atom</b> | <b>Length/Å</b> |
|-------------|-------------|-----------------|
| O1          | N1          | 1.385(3)        |
| N1          | C1          | 1.391(4)        |
| N1          | C5          | 1.371(4)        |
| N2          | C1          | 1.329(4)        |
| N2          | C2          | 1.335(4)        |
| N3          | C2          | 1.370(4)        |
| N3          | C3          | 1.340(4)        |
| N4          | C3          | 1.326(4)        |
| N4          | C4          | 1.392(3)        |
| N5          | C1          | 1.321(4)        |
| N6          | C5          | 1.309(4)        |
| C2          | C4          | 1.384(4)        |
| C4          | C5          | 1.403(4)        |

| <b>Atom</b> | <b>Atom</b> | <b>Atom</b> | <b>Angle/°</b> |
|-------------|-------------|-------------|----------------|
| O1          | N1          | C1          | 118.0(2)       |
| C5          | N1          | O1          | 116.3(2)       |
| C5          | N1          | C1          | 125.3(2)       |
| C1          | N2          | C2          | 113.5(2)       |
| C3          | N3          | C2          | 109.0(2)       |
| C3          | N4          | C4          | 107.6(2)       |
| N2          | C1          | N1          | 121.8(2)       |
| N5          | C1          | N1          | 117.3(2)       |
| N5          | C1          | N2          | 120.9(3)       |
| N2          | C2          | N3          | 126.0(2)       |
| N2          | C2          | C4          | 127.8(2)       |
| N3          | C2          | C4          | 106.2(2)       |
| N4          | C3          | N3          | 109.8(2)       |
| N4          | C4          | C5          | 133.6(3)       |
| C2          | C4          | N4          | 107.4(2)       |
| C2          | C4          | C5          | 118.8(2)       |
| N1          | C5          | C4          | 112.4(2)       |
| N6          | C5          | N1          | 120.5(2)       |
| N6          | C5          | C4          | 127.1(3)       |

**Table S15.** Torsion angles [°] for 7·2HCl.

| Atom | Atom | Atom | Atom | Angle <sup>°</sup> |
|------|------|------|------|--------------------|
| O1   | N1   | C1   | N2   | -179.2(2)          |
| O1   | N1   | C1   | N5   | 2.3(4)             |
| O1   | N1   | C5   | N6   | -3.5(4)            |
| O1   | N1   | C5   | C4   | 176.4(2)           |
| N2   | C2   | C4   | N4   | -180.0(3)          |
| N2   | C2   | C4   | C5   | -4.7(4)            |
| N3   | C2   | C4   | N4   | 0.2(3)             |
| N3   | C2   | C4   | C5   | 175.4(2)           |
| N4   | C4   | C5   | N1   | 175.2(3)           |
| N4   | C4   | C5   | N6   | -4.9(5)            |
| C1   | N1   | C5   | N6   | -176.2(3)          |
| C1   | N1   | C5   | C4   | 3.7(4)             |
| C1   | N2   | C2   | N3   | -178.1(3)          |
| C1   | N2   | C2   | C4   | 2.1(4)             |
| C2   | N2   | C1   | N1   | 3.4(4)             |
| C2   | N2   | C1   | N5   | -178.2(3)          |
| C2   | N3   | C3   | N4   | -0.3(3)            |
| C2   | C4   | C5   | N1   | 1.5(4)             |
| C2   | C4   | C5   | N6   | -178.6(3)          |
| C3   | N3   | C2   | N2   | -179.8(3)          |
| C3   | N3   | C2   | C4   | 0.0(3)             |
| C3   | N4   | C4   | C2   | -0.4(3)            |
| C3   | N4   | C4   | C5   | -174.6(3)          |
| C4   | N4   | C3   | N3   | 0.5(3)             |
| C5   | N1   | C1   | N2   | -6.7(4)            |
| C5   | N1   | C1   | N5   | 174.9(3)           |

**Table S16.** Hydrogen bond information for 7·2HCl.

| <b>D</b> | <b>H</b> | <b>A</b> | <b>d(D-H)/Å</b> | <b>d(H-A)/Å</b> | <b>d(D-A)/Å</b> | <b>D-H-A/deg</b> |
|----------|----------|----------|-----------------|-----------------|-----------------|------------------|
| O1       | H1       | Cl1      | 0.94(5)         | 2.01(5)         | 2.944(2)        | 172(4)           |
| N4       | H4       | Cl2      | 0.85(4)         | 2.30(4)         | 3.095(2)        | 154(3)           |

## NMR Spectrum of **2**.

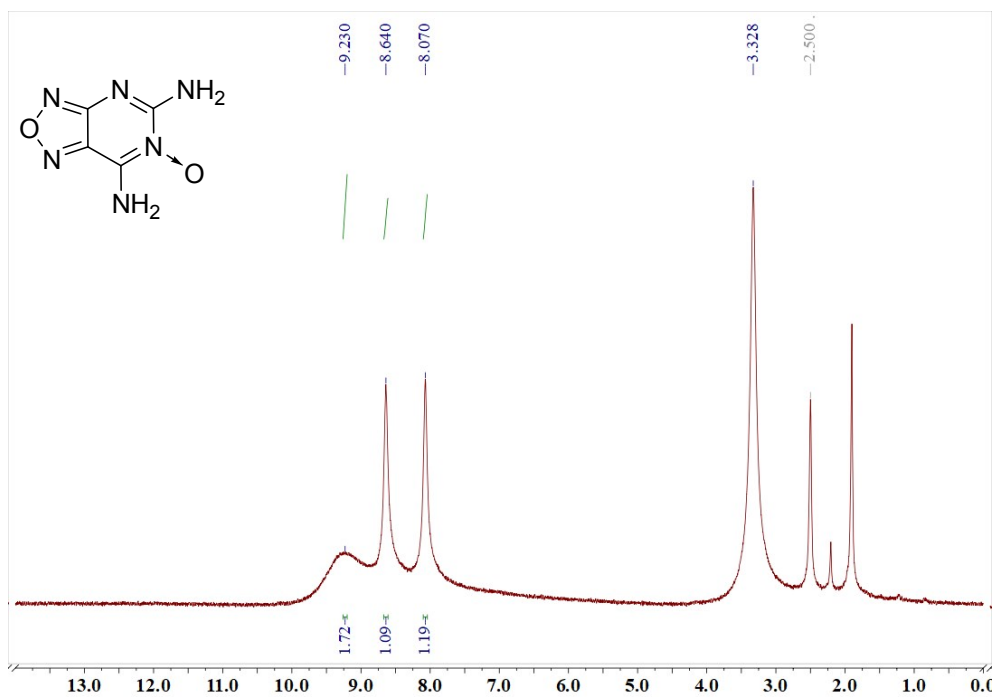

**Figure S5.** <sup>1</sup>H NMR Spectrum of **2**

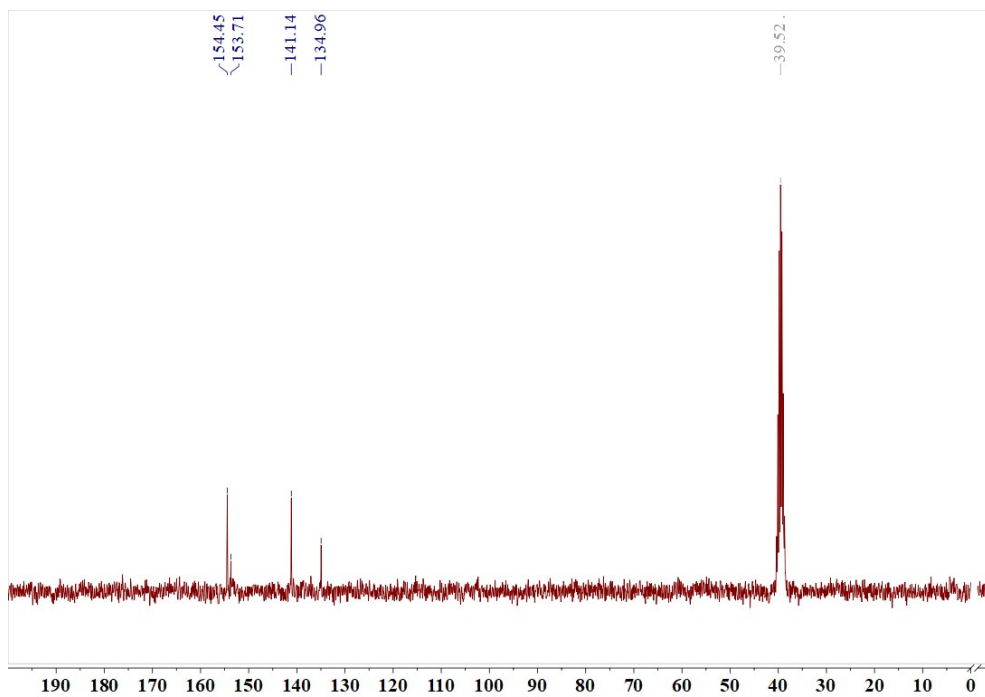

**Figure S6.** <sup>13</sup>C NMR Spectrum of **2**

### NMR Spectrum of **3**

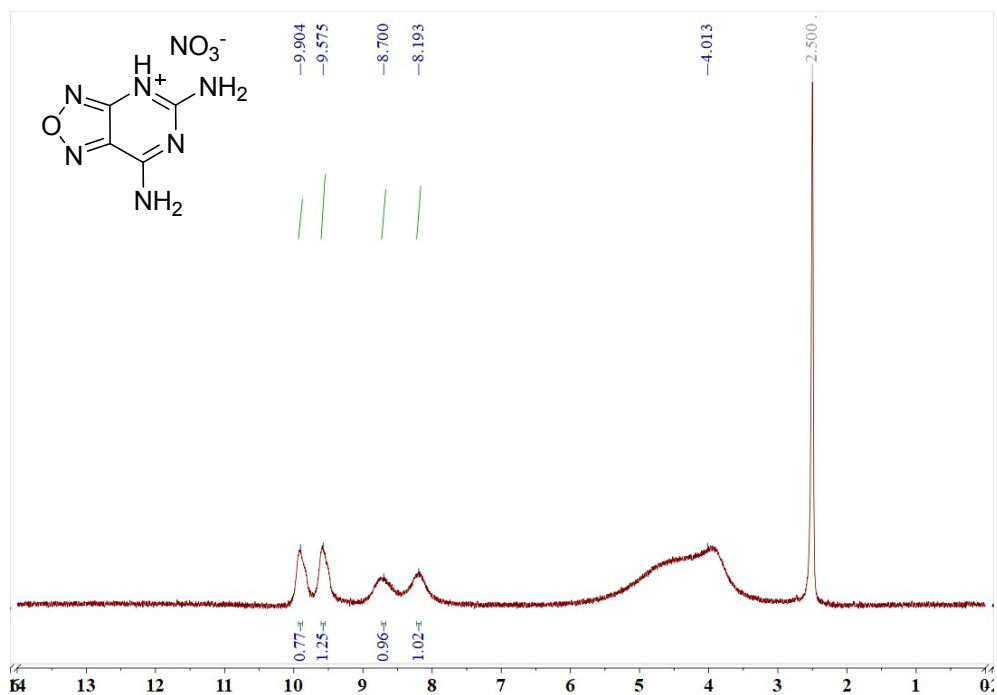

**Figure S7.** <sup>1</sup>H NMR Spectrum of **3**

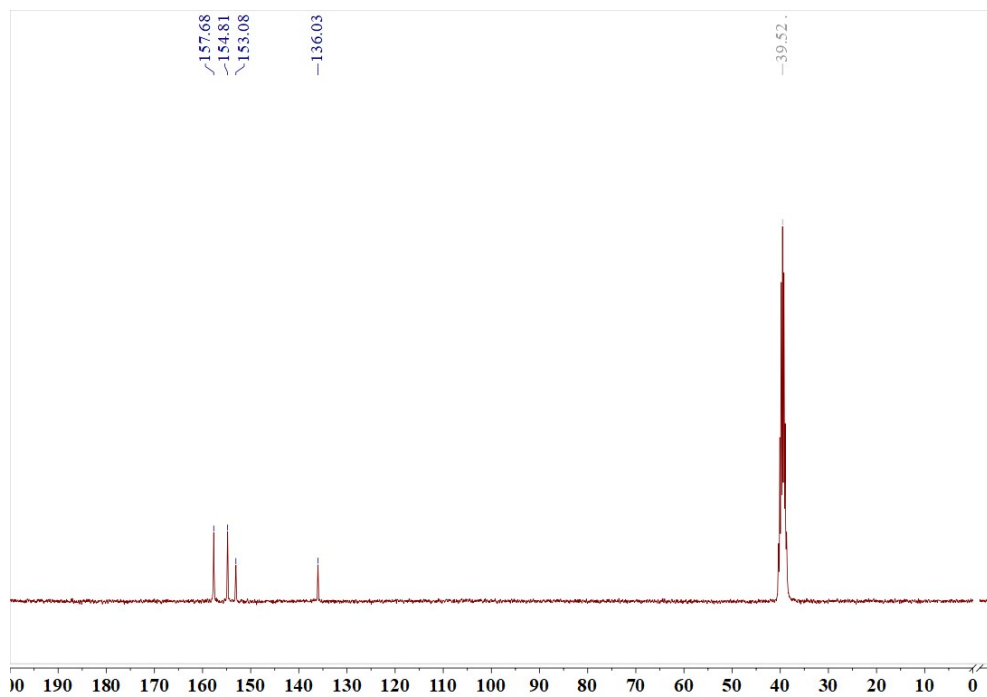

**Figure S8.** <sup>13</sup>C NMR Spectrum of **3**

## NMR Spectrum of **5**

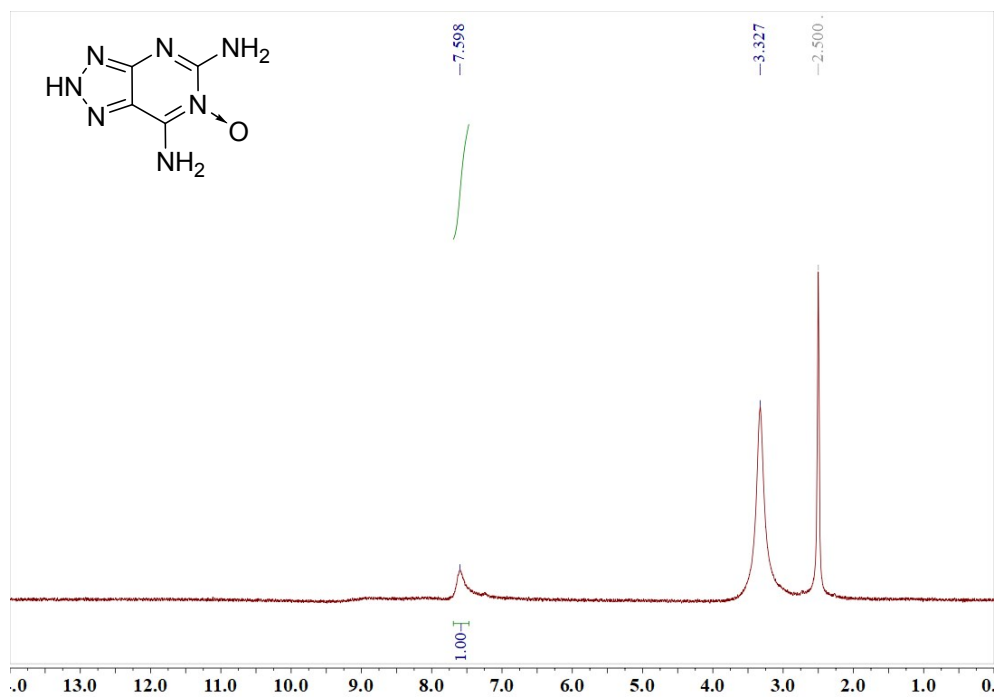

**Figure S9.** <sup>1</sup>H NMR Spectrum of **5**

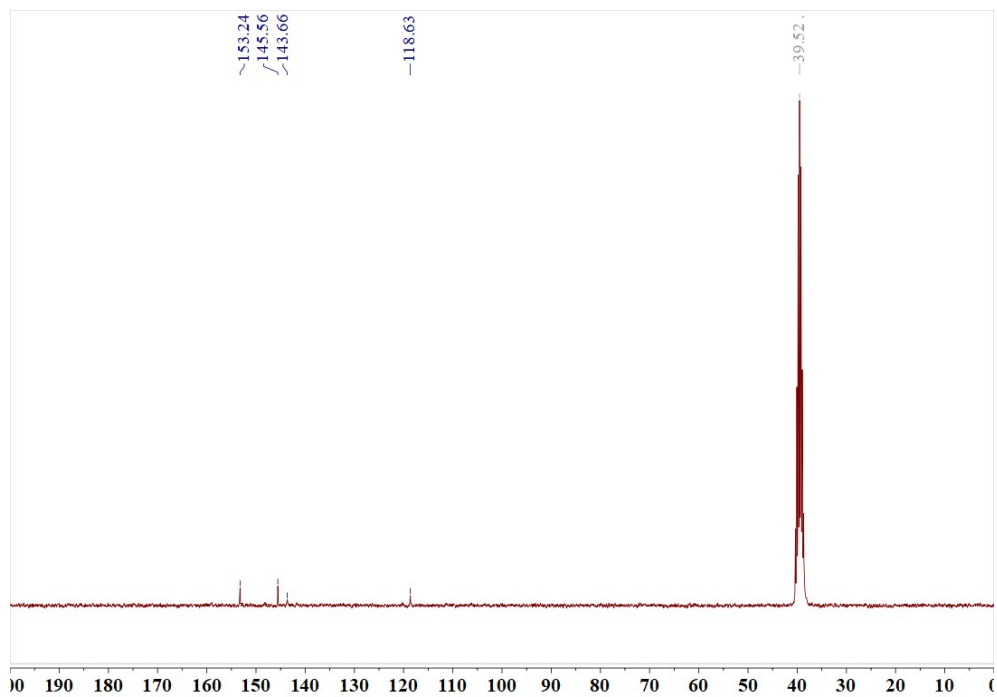

**Figure S10.** <sup>13</sup>C NMR Spectrum of **5**

# NMR Spectrum of 7

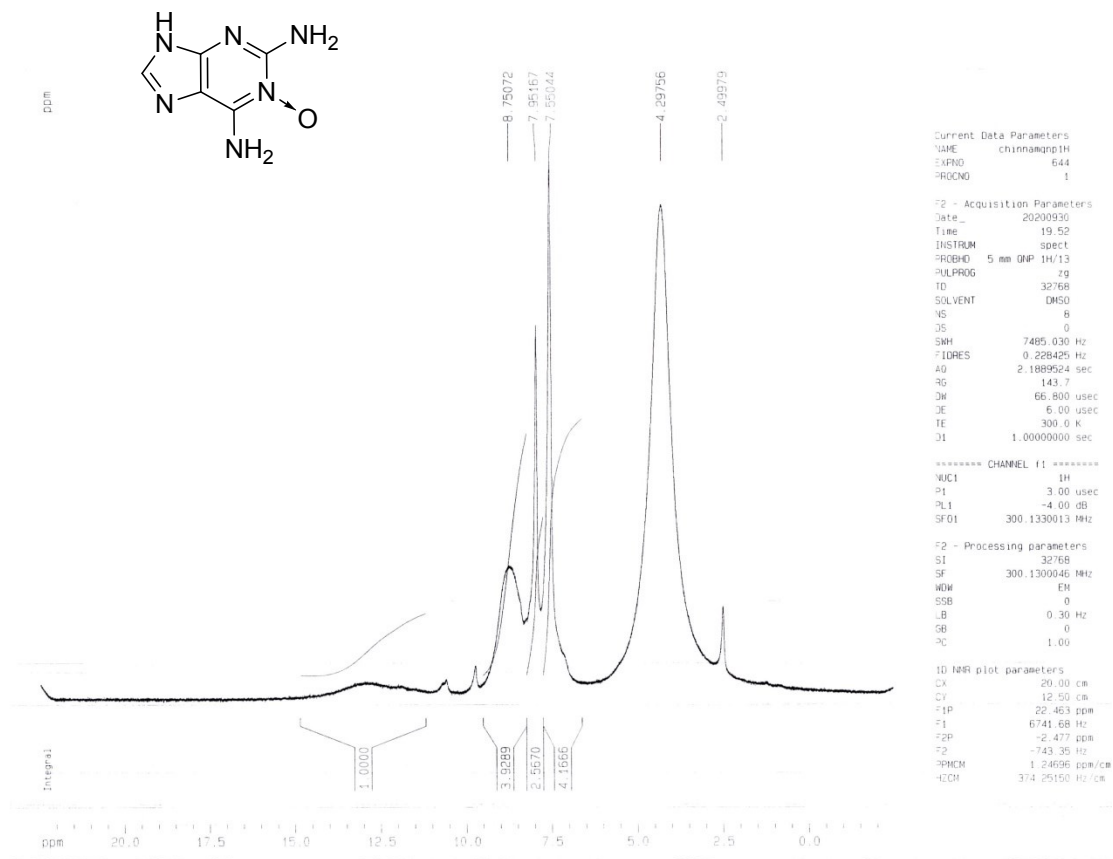

**Figure S11.** <sup>1</sup>H NMR Spectrum of 7



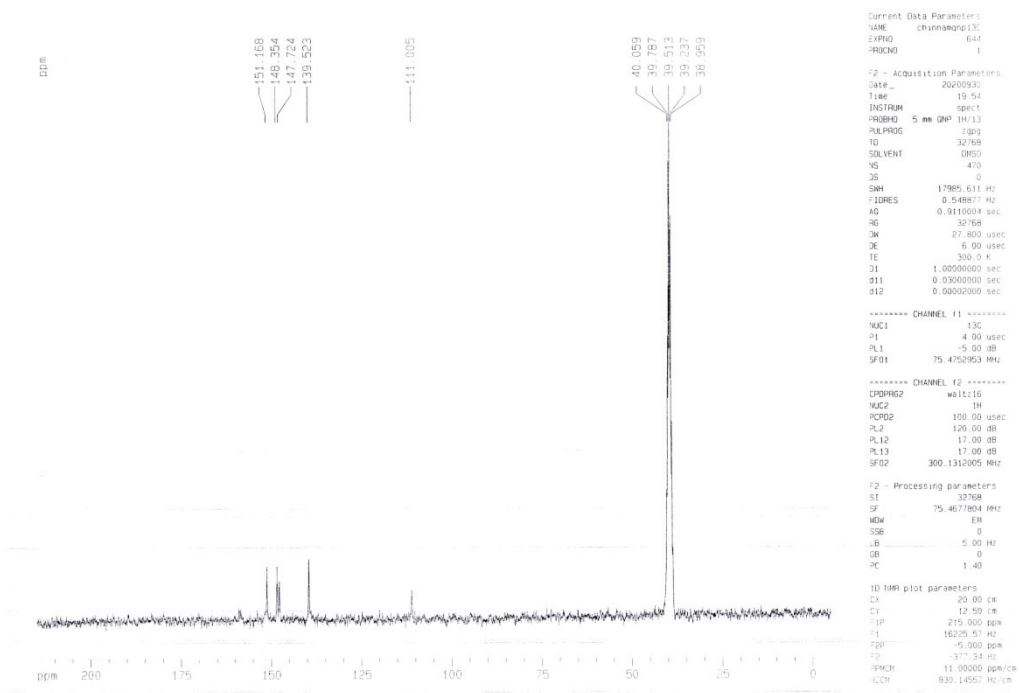

**Figure S12**  $^{13}\text{C}$  NMR Spectrum of **7**

## Reference

- 1 M. S. Westwell, M. S. Searle, D. J. Wales and D. H. Williams, *J. Am. Chem. Soc.*, 1995, **117**, 5013-5015.
- 2 H. Gao, C. Ye, C. M. Piekarski and J. M. Shreeve, *J. Phys. Chem. C*, 2007, **111**, 10718-10731.
- 3 H. D. B. Jenkins, D. Tudela and L. Glasser, *Inorg. Chem.*, 2002, **41**, 2364-2367.
- 4 Bruker, *APEX3 v2015.5-2*. Bruker AXS Inc., Madison, Wisconsin, USA, **2015**.
- 5 Bruker, *S SAINT v8.34A*. Bruker AXS Inc., Madison, Wisconsin, USA, **2013**.
- 6 Bruker, *XPREP v2014/2*. Bruker AXS Inc., Madison, Wisconsin, USA, **2014**.
- 7 Bruker, *SADABS v2014/5*, Bruker AXS Inc., Madison, Wisconsin, USA, **2014**.
- 8 G. M. Sheldrick, *SHELXL-2014/7*. University of Göttingen, Germany, 2014.
- 9 A. L. Spek, *Acta Cryst.*, 2015, **C71**, 9-19.
- 10 A. L. Spek, *Acta Cryst.*, 2009, **D65**, 148-155.
